# Supplementary material
Source: PubMed Central journal article supplement (PMC3242651)

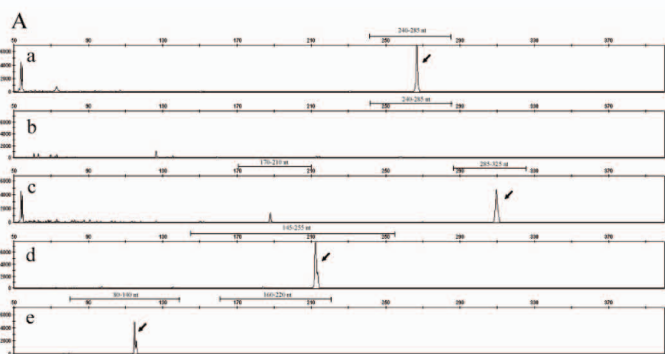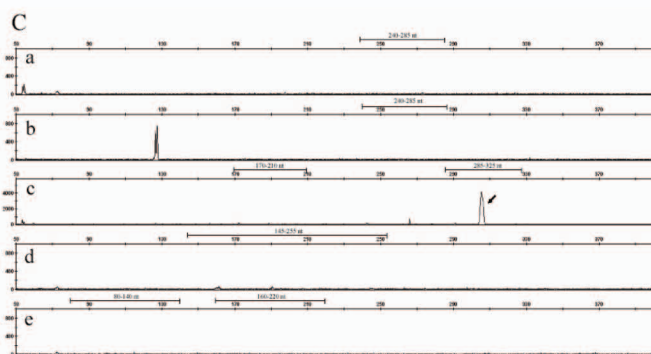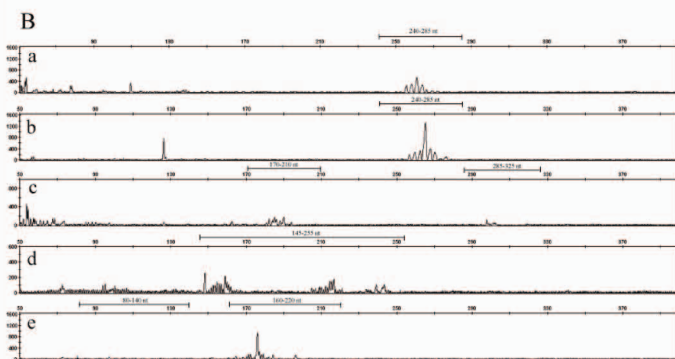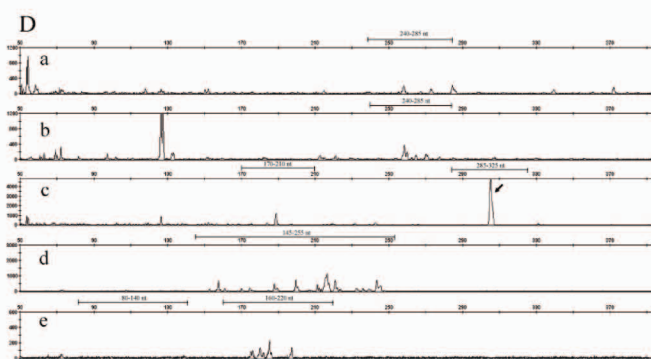

Supplement: mt2011131x1.pdf [file mt2011131x1.pdf]
